# Supplementary material for: Novel Copper Oxide Bio-Nanocrystals to Target Outer Membrane Lectin of Vancomycin-Resistant Enterococcus faecium (VREfm): In Silico, Bioavailability, Antimicrobial, and Anticancer Potential
Source: MDPI journal article supplement (doi:10.3390/molecules27227957), 2022-11-17
Supplement: s1 [file s1]

## **Supplementary Information**

### **Novel Copper Oxide Bio-nanocrystals to Target Outer Membrane Lectin of Vancomycin-Resistant *Enterococcus faecium* (VREfm): *In silico*, Bioavailability, Antimicrobial, and Anticancer Potential**

Mahmoud Kandeel <sup>1,2,\*</sup>, Mohamed Sharaf <sup>3,4,\*</sup>, Arshad Mahdi Hamad <sup>5</sup>, Ahmad O. Babalghith <sup>6</sup>,  
Mohnad Abdalla <sup>7,\*</sup>, Muhammad Arif <sup>4</sup>, Reem Binsuwaidan <sup>8</sup>, Nashwah G. M. Attallah <sup>9</sup>,  
Hossam Aladl Aladl Aladl <sup>10</sup>, Samy Selim <sup>11</sup> and Mariusz Jaremko <sup>12</sup>

**Table S1:** ADME predicted calculations of Oleuropein

| Physicochemical Properties               |                                                 |
|------------------------------------------|-------------------------------------------------|
| Formula                                  | C <sub>25</sub> H <sub>32</sub> O <sub>13</sub> |
| Molecular weight                         | 540.51 g/mol                                    |
| Num. heavy atoms                         | 38                                              |
| Num. arom. heavy atoms                   | 6                                               |
| Fraction Csp <sup>3</sup>                | 0.52                                            |
| Num. rotatable bonds                     | 11                                              |
| Num. H-bond acceptors                    | 13                                              |
| Num. H-bond donors                       | 6                                               |
| Molar Refractivity                       | 127.28                                          |
| TPSA                                     | 201.67 Å <sup>2</sup>                           |
| Lipophilicity                            |                                                 |
| Log <i>P</i> <sub>o/w</sub> (iLOGP)      | 2.65                                            |
| Log <i>P</i> <sub>o/w</sub> (XLOGP3)     | -0.45                                           |
| Log <i>P</i> <sub>o/w</sub> (WLOGP)      | -0.63                                           |
| Log <i>P</i> <sub>o/w</sub> (MLOGP)      | -1.34                                           |
| Log <i>P</i> <sub>o/w</sub> (SILICOS-IT) | -0.14                                           |
| Consensus Log <i>P</i> <sub>o/w</sub>    | 0.02                                            |
| Water Solubility                         |                                                 |
| Log <i>S</i> (ESOL)                      | -2.30                                           |
| Solubility                               | 2.72e+00 mg/ml ; 5.03e-03 mol/l                 |
| Class                                    | Soluble                                         |
| Log <i>S</i> (Ali)                       | -3.32                                           |
| Solubility                               | 2.59e-01 mg/ml ; 4.79e-04 mol/l                 |
| Class                                    | Soluble                                         |
| Log <i>S</i> (SILICOS-IT)                | -0.66                                           |
| Solubility                               | 1.19e+02 mg/ml ; 2.19e-01 mol/l                 |
| Class                                    | Soluble                                         |
| Pharmacokinetics                         |                                                 |
| GI absorption                            | Low                                             |
| BBB permeant                             | No                                              |
| P-gp substrate                           | No                                              |
| CYP1A2 inhibitor                         | No                                              |
| CYP2C19 inhibitor                        | No                                              |
| CYP2C9 inhibitor                         | No                                              |

|                             |            |
|-----------------------------|------------|
| CYP2D6 inhibitor            | No         |
| CYP3A4 inhibitor            | No         |
| Log $K_p$ (skin permeation) | -9.92 cm/s |

#### Druglikeness

|                       |                                               |
|-----------------------|-----------------------------------------------|
| Lipinski              | No; 3 violations: MW>500, NorO>10, NHorOH>5   |
| Ghose                 | No; 2 violations: MW>480, WLOGP<-0.4          |
| Veber                 | No; 2 violations: Rotors>10, TPSA>140         |
| Egan                  | No; 1 violation: TPSA>131.6                   |
| Muegge                | No; 3 violations: TPSA>150, H-acc>10, H-don>5 |
| Bioavailability Score | 0.11                                          |

#### Medicinal Chemistry

|                         |                                                         |
|-------------------------|---------------------------------------------------------|
| PAINS                   | 1 alert: catechol_A                                     |
| Brenk                   | 3 alerts: catechol, isolated_alkene, more_than_2_esters |
| Leadlikeness            | No; 2 violations: MW>350, Rotors>7                      |
| Synthetic accessibility | 6.22                                                    |
